# Supplementary material
Source: PubMed Central journal article supplement (PMC3649002)
Supplement: NIHMS464711-supplement-SUPPLEMENTAL.pdf [file NIHMS464711-supplement-SUPPLEMENTAL.pdf]

Supplemental Figures: PGE<sub>2</sub> is a UVR-inducible autocrine factor for melanocytes that stimulates tyrosinase activation

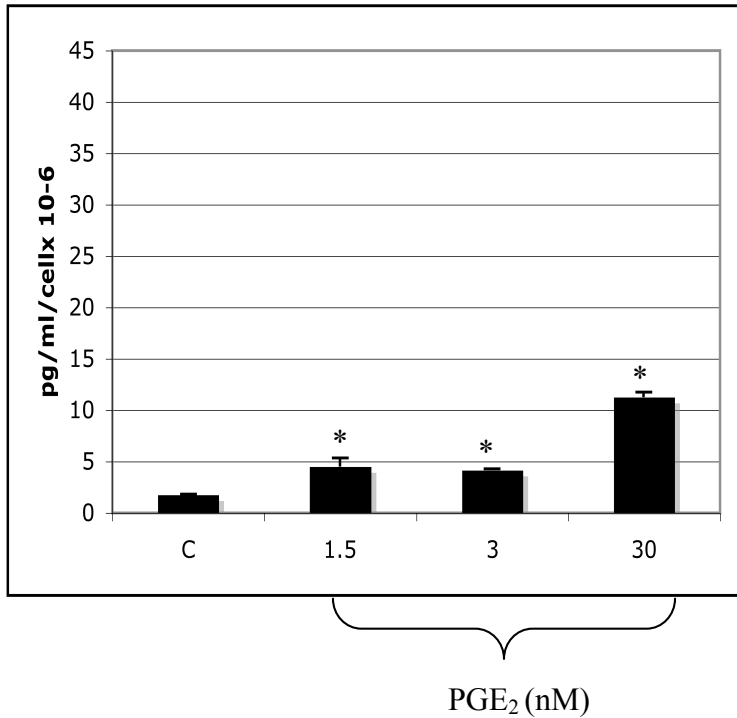

Figure S1. At doses as low as 1.5 nM, PGE<sub>2</sub> stimulated a statistically significant (\*p<0.05) increase in cAMP compared with vehicle treated controls (4.4 pg/ml/cell x 10<sup>-6</sup> compared with 1.8 pg/ml/cell x 10<sup>-6</sup> respectively); a dose of 30 nM PGE<sub>2</sub> resulted in a cAMP response of 11 pg/ml/cell x 10<sup>-6</sup>. Each bar represents the averaged cAMP levels of 3 separate experiments +/-SD, in which each experiment was performed in duplicate wells. For each experiment, melanocytes cultured from a separate Caucasian donor were used (n=3). \*p<0.05, compared with controls.

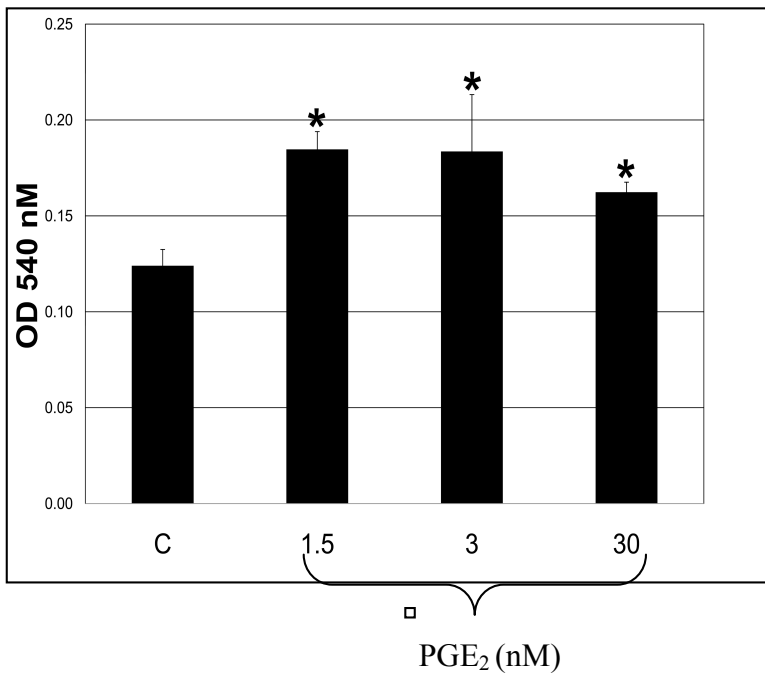

Figure S2: Melanocytes in -/- media were treated with PGE<sub>2</sub> for 24 hours or vehicle (“C”). BrDu was added for the last 18 hours, and uptake was assessed with a BrDu assay kit (Calbiochem, San Diego CA). Melanocyte proliferation was stimulated by PGE<sub>2</sub> (\*p<0.001) at each concentration. Each bar represents the average of 3 experiments +/- standard deviation (SD). For each experiment, melanocytes cultured from a separate Caucasian donor were used(n=3).
